# Supplementary material for: Engineering nanostructured electrode materials for high performance sodium ion batteries: a case study of a 3D porous interconnected WS2/C nanocomposite
Source: Royal Society of Chemistry journal article supplement (doi:10.1039/c5ta05758b), 2015-01-01
Supplement: c5ta05758b1.pdf [file c5ta05758b1.pdf]

## Supporting information

### Engineering Nanostructured Electrode Materials for High Performance Sodium Ion

#### Batteries: Case Study of 3D Porous Interconnected WS<sub>2</sub>/C Nanocomposite

Changbao Zhu,<sup>b</sup> Peter Kopold,<sup>b</sup> Weihan Li,<sup>a</sup> Peter A. van Aken,<sup>b</sup> Joachim Maier<sup>b</sup>, Yan Yu<sup>a,b,\*</sup>

<sup>a</sup>Key Laboratory of Materials for Energy Conversion, Chinese Academy of Sciences, Department of Materials Science and Engineering, University of Science and Technology of China, Hefei, 230026, Anhui, P. R. China.  
E-mail: yanyumse@ustc.edu.cn

<sup>b</sup>Max Planck Institute for Solid State Research, Heisenbergstr. 1, Stuttgart, 70569, Germany

### Experimental section

*Synthesis:* COOH-functionalized multiwalled carbon nanotube (CNT) (1.8 mg, Aldrich) and single layer graphene oxide (GO) (9 mg, Cheaptubes, USA) were added to solvent of 1,2-propanediol (30 ml, Aldrich) and dispersed by stirring and sonication to form homogeneous GO-CNT solution. Afterwards, (NH<sub>4</sub>)<sub>2</sub>WS<sub>4</sub> (0.051 g, Aldrich) was put into the above GO-CNT solution and stirred overnight to get the resultant precursor solution, which was poured into a syringe connected to a metal nozzle of 1.6 mm diameter. The flow rate was *ca.* 30 μl/min. The distance between the substrate and nozzle was 4 cm. Ti foil is used as substrates and current collector as well. The substrate was preheated to 238 °C before the deposition. The precursor solution was sprayed onto the substrate by applying a high voltage of 12 kV. The as-prepared WS<sub>2</sub>/C nanocomposites were annealed in a tube furnace at first at 450 °C for 2 hours under H<sub>2</sub> (5 vol%)/Ar (95 vol%) atmosphere, and then 600 °C for 2 hours under Ar.

*Structural and electrochemical characterization:* XRD measurements were performed with a Philips PW 3020 diffractometer using Cu-K $\alpha$  radiation. SEM was carried out using a JEOL 6300F field-emission scanning electron microscopy (JEOL, Tokyo, Japan) operated at 15 keV. TEM and HRTEM were performed by using a JEOL 4000FX transmission electron microscope (JEOL, Tokyo, Japan) operated at 400 kV.

*Electrochemical test:* WS<sub>2</sub>/C nanocomposites grown on the Ti current collector used as working electrode are directly tested without binder or any conductive additives in an electrochemical test cells (Swagelok-type), which were assembled in an argon-filled glove box (O<sub>2</sub>  $\leq$  0.1 ppm, H<sub>2</sub>O  $\leq$  3 ppm). Sodium metal is used as the counter/reference electrode, and 1 M solution of NaClO<sub>4</sub> in the propylene carbonate (PC) with 5% fluoroethylene carbonate (FEC) as the electrolyte. Glass fiber (Whatman) is used as separator. The Na batteries were discharged and charged galvanostatically in the fixed voltage window between 0.01 V to 3 V on an Arbin MSTAT battery tester at room temperature. Cyclic voltammetry was tested by Voltalab 80 electrochemical workstation at scan rate of 0.1 mV/s.

## **Figures and captions**

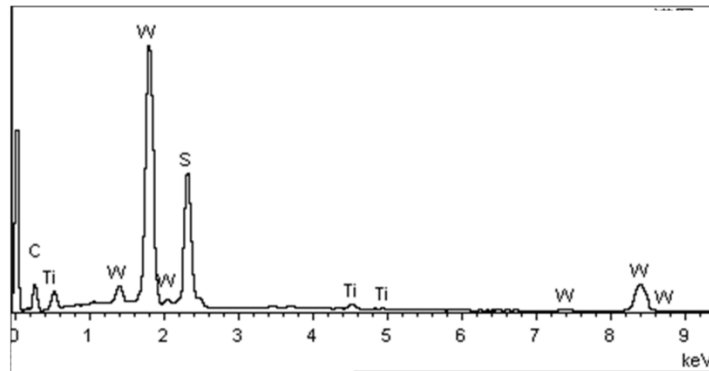

Figure S1. EDX spectra of carbon coated 3D porous interconnected WS<sub>2</sub>/C nanocomposite.

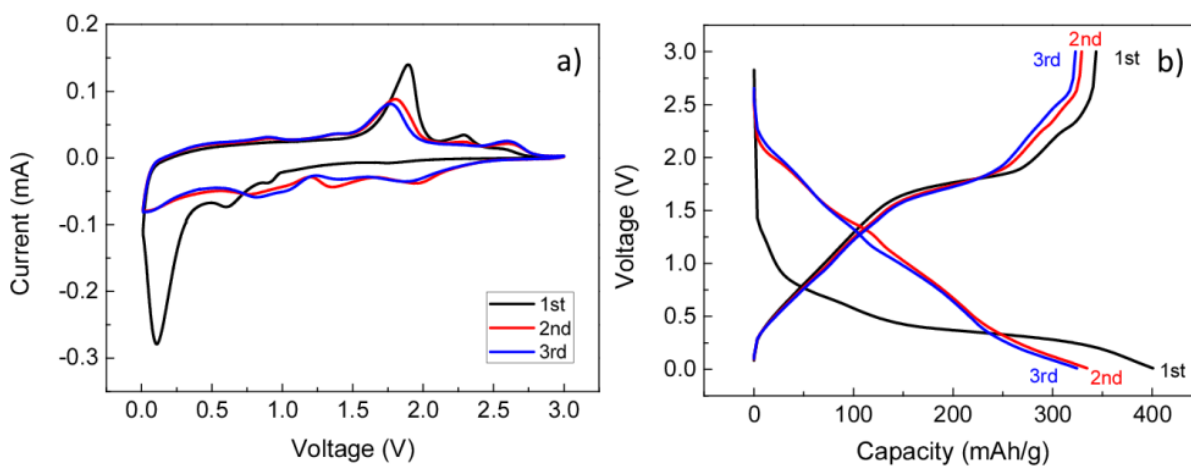

**Figure S2.** a) Cyclic voltammograms of pure WS<sub>2</sub> without rGO and CNT at scan rate of 0.1 mV/s. b) Charge and discharge voltage profiles for the first three cycles for sodium storage for pure WS<sub>2</sub> without rGO and CNT.

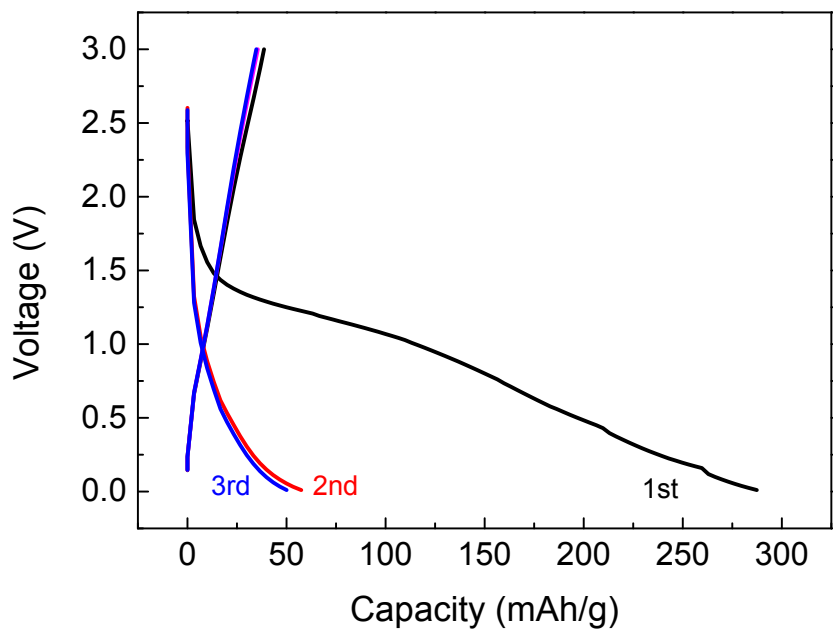

**Figure S3.** Charge and discharge voltage profiles for the first three cycles for sodium storage for pure rGO and CNT carbon composite without WS<sub>2</sub>.
